# Supplementary material for: A pandemic strain of calicivirus threatens rabbit industries in the Americas
Source: PubMed Central journal article supplement (PMC2147015; doi:10.1186/1743-422x-4-96), 2007-10-02
Supplement: 1743-422X-4-96-S1.pdf [file 1743-422X-4-96-S1.pdf]

```

      10      20      30      40      50      60      70      80      90     100
BS89 Italy  ME GKARTAPQGEAAGCTATTASVPGTTT DGLDPGVVATTSSVVTAE NSSAS IATAG IGGPPQ QVDQ QETWRTNFYINDVFTWSVADAPGSILYTVQHSPQNN
Ireland 12  .....
Ireland 19  .....
Ireland 18  .....
Saudi Arab .....
Bahrain    .....
00-08 Fran .....
95-10 Fran .....
95-05 Fran .....
AST89Spain .....
SD France  .....
Ref FRG    .....
V351 Czech .....
00-13 Fran .....
Haute88Fan .....
WX84 China .....
Mexico89   .....
New Zeal   .....
WriezenFRG .....
HagenowFRG .....
Eisen FRG  .....
Meinin FRG .....
Frank FRG  .....
Rain Italy  .....
Korea 90   .....
Italy 90   .....
Hartm FRG  .....
CUB5-04    .....
WHN3China  .....
WHN2China  .....
YL China   .....
03-24 Fran .....
WHNRH Chin .....
JXCHA97    .....
CD China   .....
NJ1985Chin .....
TriptisFRG .....
00-Reu Fra .....
TP HarChin .....
99-05 Fran .....
WHN1China  .....
IA00 USA   .....
IN05 USA   .....
NY01 USA   .....
UT01 USA   .....
RCV        .....

```

```

      110     120     130     140     150     160     170     180     190     200
BS89 Italy  PFTAVLSQMYAGWAGGMQFRFIVAGSGVFGGRLVAAVLPPGLEIGPGLV RQFP HVVIDARSL EPVTITMPDLRPNMHP TGD PGLVPTLVLSVYNNLIN
Ireland 12  .....
Ireland 19  .....
Ireland 18  .....
Saudi Arab .....
Bahrain    .....
00-08 Fran .....
95-10 Fran .....
95-05 Fran .....
AST89Spain .....
SD France  .....
Ref FRG    .....
V351 Czech .....
00-13 Fran .....
Haute88Fan .....
WX84 China .....
Mexico89   .....
New Zeal   .....
WriezenFRG .....
HagenowFRG .....
Eisen FRG  .....
Meinin FRG .....
Frank FRG  .....
Rain Italy  .....
Korea 90   .....
Italy 90   .....
Hartm FRG  .....
CUB5-04    .....
WHN3China  .....
WHN2China  .....
YL China   .....
03-24 Fran .....
WHNRH Chin .....
JXCHA97    .....
CD China   .....
NJ1985Chin .....
TriptisFRG .....
00-Reu Fra .....
TP HarChin .....
99-05 Fran .....
WHN1China  .....
IA00 USA   .....
IN05 USA   .....
NY01 USA   .....
UT01 USA   .....
RCV        .....

```



|            | 410 | 420 | 430 | 440 | 450 | 460 | 470 | 480 | 490 | 500 |
|------------|-----|-----|-----|-----|-----|-----|-----|-----|-----|-----|
| BS89 Italy | A   | K   | S   | I   | Y   | A   | V   | V   | T   | G   |
| Ireland 12 | .   | G   | S   | .   | I   | .   | .   | .   | S   | T   |
| Ireland 19 | .   | G   | S   | .   | I   | .   | .   | .   | A   | T   |
| Ireland 18 | .   | G   | S   | .   | I   | .   | .   | .   | A   | T   |
| Saudi Arab | .   | T   | .   | I   | .   | .   | .   | .   | S   | S   |
| Bahrain    | .   | G   | .   | I   | .   | .   | .   | .   | S   | T   |
| 00-08 Fran | .   | S   | T   | .   | .   | S   | .   | I   | .   | S   |
| 95-10 Fran | .   | .   | .   | I   | .   | .   | .   | .   | S   | S   |
| 95-05 Fran | .   | T   | .   | .   | S   | .   | .   | .   | .   | .   |
| AST89Spain | .   | .   | .   | .   | S   | .   | .   | .   | .   | .   |
| SD France  | .   | .   | .   | .   | S   | .   | .   | .   | .   | R   |
| Ref FRG    | .   | .   | .   | I   | .   | S   | .   | .   | .   | .   |
| V351 Czech | .   | .   | .   | I   | .   | S   | .   | .   | .   | .   |
| 00-13 Fran | .   | G   | .   | I   | .   | .   | .   | A   | .   | T   |
| Haute88Fan | .   | .   | .   | .   | .   | .   | .   | .   | .   | .   |
| WX84 China | .   | .   | .   | S   | .   | .   | .   | .   | .   | .   |
| Mexico89   | .   | .   | .   | .   | .   | .   | .   | V   | .   | .   |
| New Zeal   | .   | .   | .   | I   | .   | S   | .   | .   | V   | .   |
| WriezenFRG | .   | G   | .   | I   | .   | .   | .   | T   | .   | Y   |
| HagenowFRG | .   | .   | .   | .   | A   | .   | .   | .   | V   | .   |
| Eisen FRG  | .   | .   | .   | S   | .   | .   | .   | .   | .   | .   |
| Meinin FRG | .   | T   | .   | .   | S   | .   | N   | .   | .   | .   |
| Frank FRG  | .   | .   | .   | .   | .   | .   | .   | .   | S   | .   |
| Rain Italy | .   | .   | .   | I   | .   | .   | .   | S   | .   | .   |
| Korea 90   | .   | T   | .   | .   | S   | .   | .   | .   | V   | .   |
| Italy 90   | .   | .   | .   | I   | .   | S   | .   | .   | .   | .   |
| Hartm FRG  | .   | N   | .   | T   | .   | S   | .   | V   | .   | .   |
| CUB5-04    | .   | N   | .   | T   | .   | S   | .   | V   | .   | .   |
| WHN3China  | .   | N   | .   | T   | .   | .   | .   | V   | .   | .   |
| WHN2China  | .   | N   | .   | T   | .   | S   | .   | V   | .   | .   |
| YL China   | .   | N   | .   | T   | .   | .   | .   | V   | .   | .   |
| 03-24 Fran | .   | N   | .   | T   | .   | S   | .   | V   | .   | .   |
| WHNRH Chin | .   | N   | .   | T   | .   | S   | .   | V   | .   | .   |
| JXCHA97    | .   | N   | .   | T   | .   | S   | .   | V   | .   | .   |
| CD China   | .   | N   | .   | T   | .   | I   | .   | S   | .   | S   |
| NJ1985Chin | .   | N   | .   | T   | .   | .   | .   | V   | .   | S   |
| TriptisFRG | .   | N   | .   | T   | .   | S   | .   | V   | .   | .   |
| 00-Reu Fra | .   | N   | .   | T   | .   | .   | .   | V   | .   | .   |
| TP HarChin | .   | N   | .   | T   | .   | S   | .   | V   | .   | .   |
| 99-05 Fran | .   | N   | .   | T   | .   | S   | .   | V   | .   | .   |
| WHN1China  | .   | N   | .   | T   | .   | .   | .   | V   | .   | K   |
| IA00 USA   | .   | N   | .   | T   | .   | S   | .   | V   | .   | .   |
| IN05 USA   | .   | N   | .   | T   | .   | I   | .   | S   | .   | V   |
| NY01 USA   | .   | N   | .   | T   | .   | .   | .   | V   | .   | .   |
| UT01 USA   | .   | N   | .   | T   | .   | I   | .   | S   | .   | V   |
| RCV        | S   | .   | A   | N   | .   | .   | T   | .   | R   | .   |

|            | 510 | 520 | 530 | 540 | 550 | 560 | 570 | 580 |
|------------|-----|-----|-----|-----|-----|-----|-----|-----|
| BS89 Italy | N   | N   | Y   | S   | S   | A   | L   | M   |
| Ireland 12 | .   | .   | .   | .   | .   | .   | .   | .   |
| Ireland 19 | .   | .   | .   | .   | .   | .   | .   | .   |
| Ireland 18 | .   | .   | .   | .   | .   | .   | .   | .   |
| Saudi Arab | .   | .   | .   | .   | .   | .   | .   | .   |
| Bahrain    | .   | .   | .   | .   | .   | .   | .   | .   |
| 00-08 Fran | .   | .   | .   | .   | .   | .   | .   | .   |
| 95-10 Fran | .   | .   | .   | .   | .   | .   | .   | .   |
| 95-05 Fran | .   | .   | .   | .   | .   | .   | .   | .   |
| AST89Spain | .   | .   | .   | .   | .   | .   | .   | .   |
| SD France  | .   | .   | .   | .   | .   | .   | .   | .   |
| Ref FRG    | .   | .   | .   | .   | .   | .   | .   | .   |
| V351 Czech | .   | .   | .   | .   | .   | .   | .   | .   |
| 00-13 Fran | .   | .   | .   | .   | .   | .   | .   | .   |
| Haute88Fan | .   | .   | .   | .   | .   | .   | .   | .   |
| WX84 China | .   | .   | .   | .   | .   | .   | .   | .   |
| Mexico89   | .   | .   | .   | .   | .   | .   | .   | .   |
| New Zeal   | .   | .   | .   | .   | .   | .   | .   | .   |
| WriezenFRG | .   | .   | .   | .   | .   | .   | .   | .   |
| HagenowFRG | .   | .   | .   | .   | .   | .   | .   | .   |
| Eisen FRG  | .   | .   | .   | .   | .   | .   | .   | .   |
| Meinin FRG | .   | .   | .   | .   | .   | .   | .   | .   |
| Frank FRG  | .   | .   | .   | .   | .   | .   | .   | .   |
| Rain Italy | .   | .   | .   | .   | .   | .   | .   | .   |
| Korea 90   | .   | .   | .   | .   | .   | .   | .   | .   |
| Italy 90   | .   | .   | .   | .   | .   | .   | .   | .   |
| Hartm FRG  | .   | .   | .   | .   | .   | .   | .   | .   |
| CUB5-04    | .   | .   | .   | .   | .   | .   | .   | .   |
| WHN3China  | .   | .   | .   | .   | .   | .   | .   | .   |
| WHN2China  | .   | .   | .   | .   | .   | .   | .   | .   |
| YL China   | .   | .   | .   | .   | .   | .   | .   | .   |
| 03-24 Fran | .   | .   | .   | .   | .   | .   | .   | .   |
| WHNRH Chin | .   | .   | .   | .   | .   | .   | .   | .   |
| JXCHA97    | .   | .   | .   | .   | .   | .   | .   | .   |
| CD China   | .   | .   | .   | .   | .   | .   | .   | .   |
| NJ1985Chin | .   | .   | .   | .   | .   | .   | .   | .   |
| TriptisFRG | .   | .   | .   | .   | .   | .   | .   | .   |
| 00-Reu Fra | .   | .   | .   | .   | .   | .   | .   | .   |
| TP HarChin | .   | .   | .   | .   | .   | .   | .   | .   |
| 99-05 Fran | .   | .   | .   | .   | .   | .   | .   | .   |
| WHN1China  | .   | .   | .   | .   | .   | .   | .   | .   |
| IA00 USA   | .   | .   | .   | .   | .   | .   | .   | .   |
| IN05 USA   | .   | .   | .   | .   | .   | .   | .   | .   |
| NY01 USA   | .   | .   | .   | .   | .   | .   | .   | .   |
| UT01 USA   | .   | .   | .   | .   | .   | .   | .   | .   |
| RCV        | T   | .   | .   | N   | .   | .   | N   | .   |
